# Supplementary material for: No Changes in Body Composition and Adherence to the Mediterranean Diet after a 12-Week Aerobic Training Intervention in Women with Systemic Lupus Erythematosus: The EJERCITA-LES Study
Source: MDPI journal article supplement (doi:10.3390/nu15204424), 2023-10-18
Supplement: s1 [file s1]

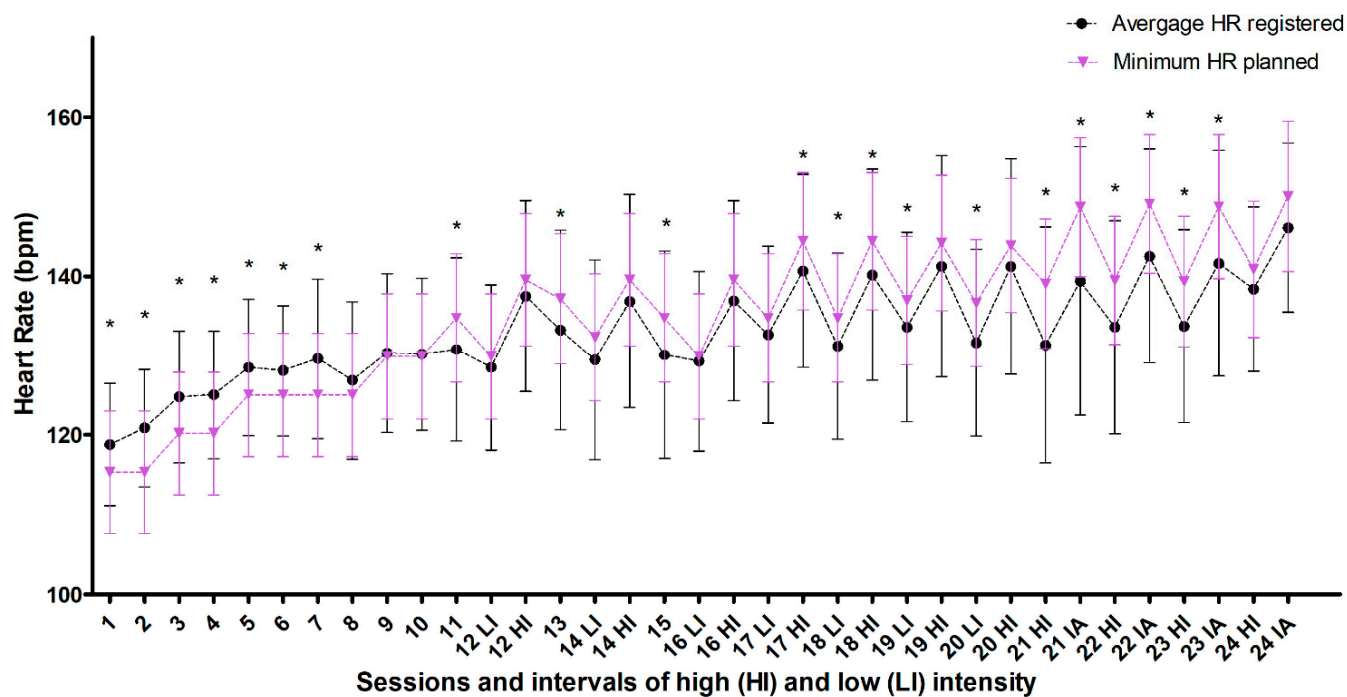

**Supplementary Figure S1.** Differences between average heart rate (HR) registered and minimum heart rate planned for sessions and intervals of the training program. Bpm: beats per minute, \*  $p < 0.05$
